# Supplementary material
Source: PubMed Central journal article supplement (PMC3613970)
Supplement: Supp_Data.pdf [file Supp_Data.pdf]

## Supplementary Data

### Materials and Methods

#### Animal conditions and survival rate

BALB/c mice (8–10 weeks old males of about 25 g of weight) were purchased from Harlan ( $n=20$ ). One week later, they were injected intravenously with  $1 \times 10^6$  ( $n=5$ ),  $3 \times 10^6$  ( $n=5$ ), and  $6 \times 10^6$  ( $n=5$ ) human adipose-derived stem cells re-

suspended in 200  $\mu$ L of phosphate-buffered saline or with saline only ( $n=5$ ). For the  $6 \times 10^6$  cell administration,  $3 \times 10^6$  cells were injected, and 48 h later, an equal dose was given. Mice were observed twice a day for clinical symptoms (appearance, vital signs, and abnormal response), and food and water intake was measured regularly. The body weight was monitored before injection and at 1–3-day intervals during the follow-up.

SUPPLEMENTARY TABLE S1. BODY WEIGHT PROFILE AND SURVIVAL DATA OF BALB/C MICE INJECTED INTRAVENOUSLY WITH  $1 \times 10^6$ ,  $3 \times 10^6$ ,  $6 \times 10^6$  hASCs/MOUSE, EXPRESSED IN GRAMS ( $N=5$ , MEAN  $\pm$  SEM), AND AS % OF ALIVE ANIMALS, RESPECTIVELY

|                                       | T0             | T7             | T14            | T21            | T28            |                 |
|---------------------------------------|----------------|----------------|----------------|----------------|----------------|-----------------|
| PBS/saline<br>(n=5)                   | 24.0 $\pm$ 0.2 | 24.2 $\pm$ 0.2 | 24.3 $\pm$ 0.2 | 24.5 $\pm$ 0.2 | 24.7 $\pm$ 0.1 | Body weight (g) |
|                                       | 100            | 100            | 100            | 100            | 100            | % of survival   |
| $1 \times 10^6$ hASCs /mouse<br>(n=5) | 24.0 $\pm$ 0.2 | 24.0 $\pm$ 0.3 | 24.0 $\pm$ 0.5 | 24.0 $\pm$ 0.4 | 24.0 $\pm$ 0.4 | Body weight (g) |
|                                       | 100            | 100            | 100            | 100            | 100            | % of survival   |
| $3 \times 10^6$ hASCs /mouse<br>(n=5) | 24.2 $\pm$ 0.3 | 24.1 $\pm$ 0.2 | 24.2 $\pm$ 0.2 | 24.6 $\pm$ 0.2 | 24.8 $\pm$ 0.3 | Body weight (g) |
|                                       | 100            | 100            | 100            | 100            | 100            | % of survival   |
| $6 \times 10^6$ hASCs /mouse<br>(n=5) | 23.9 $\pm$ 0.2 | 24.0 $\pm$ 0.4 | 24.2 $\pm$ 0.4 | 24.3 $\pm$ 0.2 | 24.4 $\pm$ 0.2 | Body weight (g) |
|                                       | 100            | 100            | 100            | 100            | 100            | % of survival   |

Mice injected with just vehicle (PBS) are indicated as control.  
hASCs, human adipose-derived stem cells; PBS, phosphate-buffered saline.
